# Supplementary material for: Clearing the Fog: A Systematic Review on Cognitive Dysfunction in COVID-19
Source: bioRxiv or medRxiv preprint supplement (doi:10.1101/2022.05.24.22275552), 2022-05-25
Supplement: Supplementary file [file media-1.pdf]

## **Clearing the Fog: A Systematic Review on Cognitive Dysfunction in COVID-19**

### **Supplemental Appendix A. Search Strategy**

#### **PubMed**

“COVID-19 and neurocognitive dysfunction” OR “brain fog”

#### **Oxford University Press**

“COVID-19 and neurocognitive impairment” OR “COVID-19 and brain fog” OR “COVID-19 and cognitive dysfunction” OR “COVID-19 and memory problems”

#### **ProQuest Health and Medical Complete**

“COVID-19 and brain fog” “COVID-19 and neurological mechanism”

#### **ScienceDirect**

“COVID-19 and neurocognitive impairment” OR “brain fog” OR “COVID-19 and confusion” OR “COVID-19 and memory problems” OR “COVID-19 and brain fog” OR “COVID-19 and pathophysiology” OR “COVID-19 and neurological mechanism” OR “COVID-19 and cognitive dysfunction”

#### **Jstor**

“COVID-19 and brain [public health]” OR “COVID and neurological impairment”

#### **HERDIN**

“COVID and brain fog”

#### **Google Scholar**

“Brain fog Covid-19” OR “brain fog covid-19” “Cognitive dysfunction Covid-19” OR “cognitive dysfunction covid-19” OR “Cognitive deficit Covid-19” OR “cognitive deficit covid-19” OR “neurocognitive dysfunction and Covid-19” OR “cognitive impairment Covid-19” OR “cognitive impairment COVID19”

#### **Cochrane Library**

“SARS-CoV-2 and neurocognitive impairment” OR “SARS-CoV-2 and brain fog” OR “COVID-19 and cognitive dysfunction”
